# Supplementary material for: Photocatalytic oxidation of small molecule hydrocarbons over Pt/TiO2 nanocatalysts
Source: Royal Society of Chemistry journal article supplement (doi:10.1039/c5ra22459d), 2015-12-23
Supplement: c5ra22459d1.pdf [file c5ra22459d1.pdf]

## Supporting Information

### Photocatalytic oxidation of small molecule hydrocarbons over Pt/TiO<sub>2</sub> nanocatalysts

Yunpeng Li,<sup>ab</sup> Yuanzhu Cai,<sup>a</sup> Xuxing Chen,<sup>a</sup> Xiaoyang Pan,<sup>a</sup> Mingxue Yang<sup>a</sup> and  
Zhiguo Yi<sup>\*a</sup>

<sup>a</sup>Key Laboratory of Design and Assembly of Functional Nanostructures & Fujian  
Provincial Key Laboratory of Nanomaterials, Fujian Institute of Research on the  
Structure of Matter, Chinese Academy of Science, Fuzhou 350002, China

<sup>b</sup>College of Material Science and Engineering, Fujian Normal University, Fuzhou  
350007, China

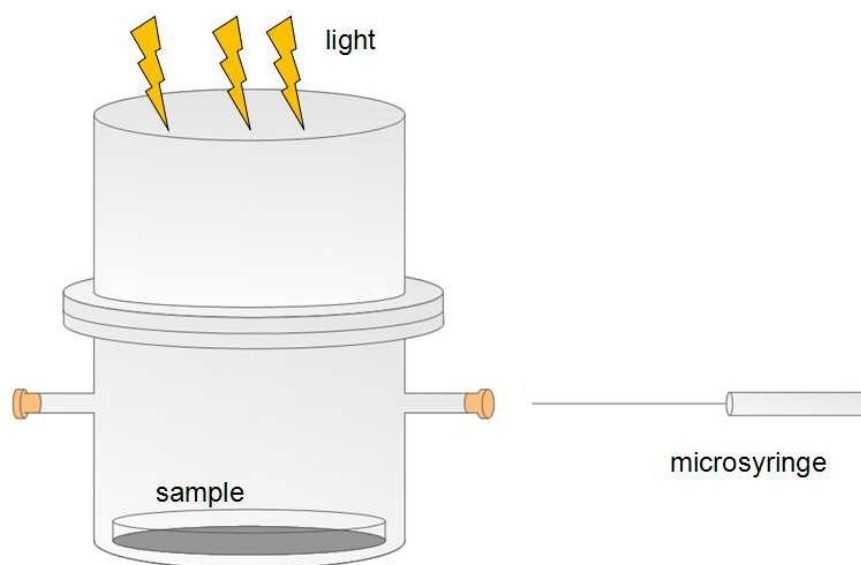

**Figure S1** The sketch of photoreaction in a sealed quartz reactor

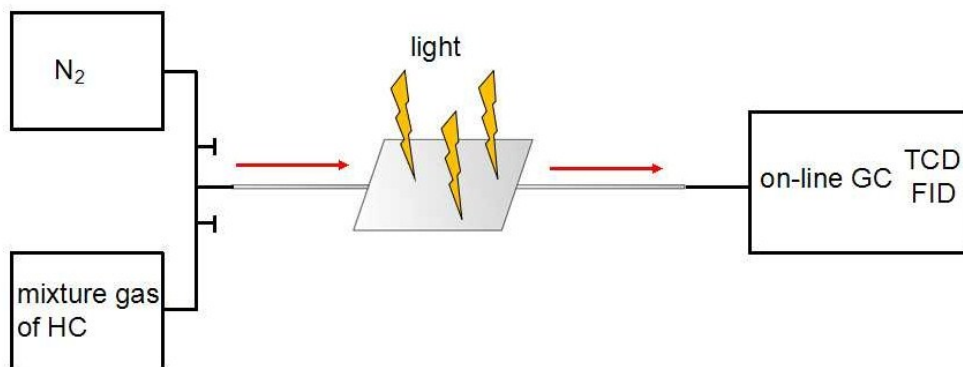

**Figure S2** The schematic diagram of continues flow photocatalytic test

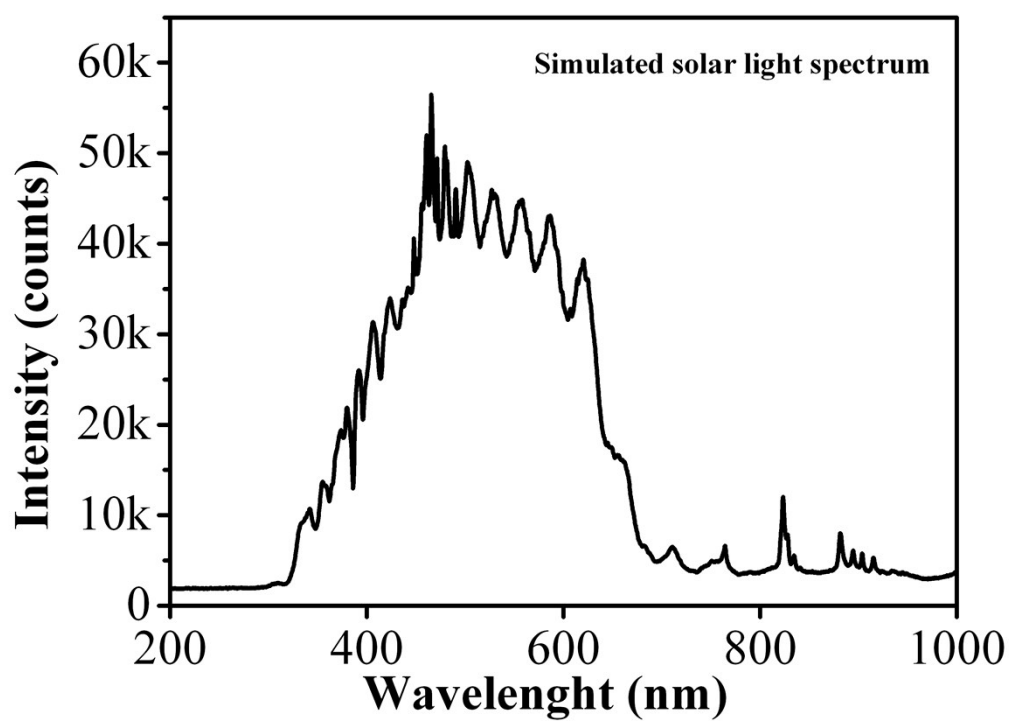

**Figure S3** The spectrum of simulated solar light

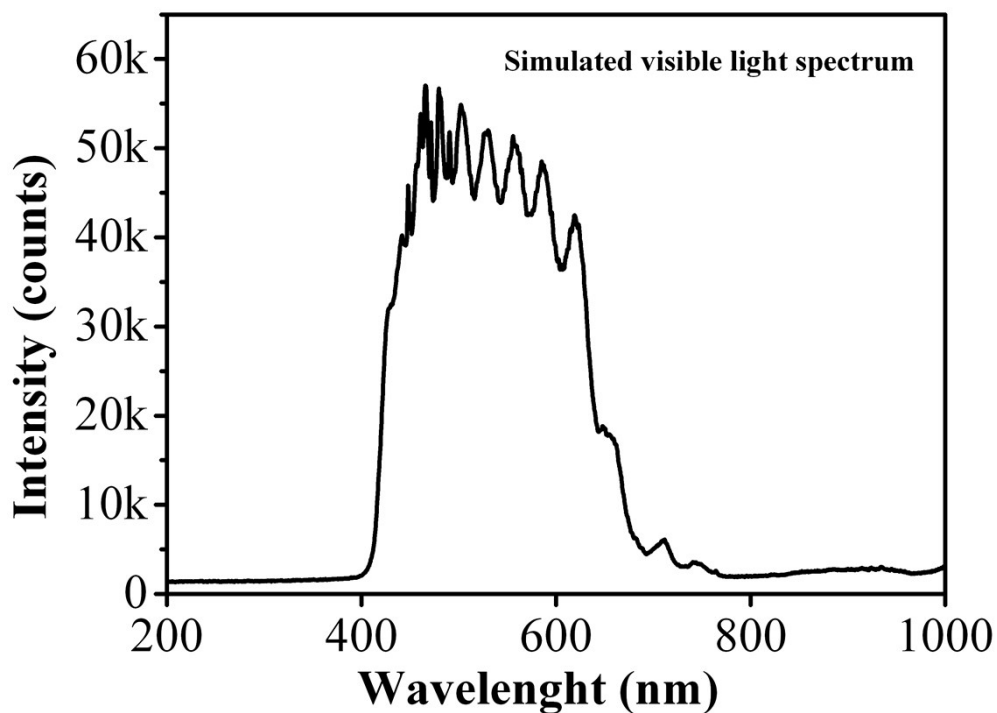

**Figure S4** The visible light spectrum of simulated solar light

**S5:** The turnover number (TON) calculations:

**For the C<sub>2</sub>H<sub>4</sub>:**

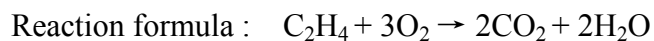

The number of electrons gain and loss in the reaction :  $12 \cdot \text{e}^-$

The amount of substance 10 mL C<sub>2</sub>H<sub>4</sub>:  $n_1 = 0.446 \times 10^{-3} \text{ mol}$

The total amount of substance of electrons gain and loss in the photo-degradation of

10 mL C<sub>2</sub>H<sub>4</sub>:  $n_2 = n_1 \times 12 \text{ mol} = 5.3525 \times 10^{-3} \text{ mol}$

For the 0.2 g Pt (0.2%)/P25 catalyst:

The amount of substance Pt:  $n_{\text{Pt}} = 2.05 \times 10^{-6} \text{ mol}$

The amount of substance TiO<sub>2</sub>:  $n_{\text{TiO}_2} = 2.45 \times 10^{-3} \text{ mol}$

For Pt:  $\text{TON}_{\text{Pt}} = n_2 / n_{\text{Pt}} = 2.61 \times 10^3$

---

For  $\text{TiO}_2$ :  $\text{TON}_{\text{TiO}_2} = n_2/n_{\text{TiO}_2} = 2.18$

**For the  $\text{C}_2\text{H}_6$ :**

Reaction formula :  $\text{C}_2\text{H}_6 + 3.5\text{O}_2 \rightarrow 2\text{CO}_2 + 3\text{H}_2\text{O}$

The number of electrons gain and loss in the reaction :  $14 \cdot e^-$

The amount of substance 10 mL  $\text{C}_2\text{H}_6$ :  $n_1 = 0.446 \times 10^{-3} \text{ mol}$

The total amount of substance of electrons gain and loss in the photo-degradation of 10 mL  $\text{C}_2\text{H}_6$ :  $n_2 = n_1 \times 14 \text{ mol} = 6.244 \times 10^{-3} \text{ mol}$

For the 0.2 g Pt (0.2%)/P25 catalyst:

The amount of substance Pt:  $n_{\text{Pt}} = 2.05 \times 10^{-6} \text{ mol}$

The amount of substance  $\text{TiO}_2$ :  $n_{\text{TiO}_2} = 2.45 \times 10^{-3} \text{ mol}$

For Pt:  $\text{TON}_{\text{Pt}} = n_2/n_{\text{Pt}} = 3.05 \times 10^3$

For  $\text{TiO}_2$ :  $\text{TON}_{\text{TiO}_2} = n_2/n_{\text{TiO}_2} = 2.55$

**For the  $\text{C}_3\text{H}_6$ :**

Reaction formula :  $\text{C}_3\text{H}_6 + 4.5\text{O}_2 \rightarrow 3\text{CO}_2 + 3\text{H}_2\text{O}$

The number of electrons gain and loss in the reaction :  $18 \cdot e^-$

The amount of substance 10 mL  $\text{C}_3\text{H}_6$ :  $n_1 = 0.446 \times 10^{-3} \text{ mol}$

The total amount of substance of electrons gain and loss in the photo-degradation of 10 mL  $\text{C}_3\text{H}_6$ :  $n_2 = n_1 \times 18 \text{ mol} = 8.028 \times 10^{-3} \text{ mol}$

For the 0.2 g Pt (0.2%)/P25 catalyst:

---

The amount of substance Pt:  $n_{\text{Pt}} = 2.05 \times 10^{-6} \text{ mol}$

The amount of substance  $\text{TiO}_2$ :  $n_{\text{TiO}_2} = 2.45 \times 10^{-3} \text{ mol}$

For Pt:  $\text{TON}_{\text{Pt}} = n_2/n_{\text{Pt}} = 3.92 \times 10^3$

For  $\text{TiO}_2$ :  $\text{TON}_{\text{TiO}_2} = n_2/n_{\text{TiO}_2} = 3.23$

**For the  $\text{C}_3\text{H}_8$ :**

Reaction formula :  $\text{C}_3\text{H}_8 + 5\text{O}_2 \rightarrow 3\text{CO}_2 + 4\text{H}_2\text{O}$

The number of electrons gain and loss in the reaction :  $20 \cdot e^{-1}$

The amount of substance 10 mL  $\text{C}_3\text{H}_8$ :  $n_1 = 0.446 \times 10^{-3} \text{ mol}$

The total amount of substance of electrons gain and loss in the photo-degradation of  
10 mL  $\text{C}_3\text{H}_8$ :  $n_2 = n_1 \times 20 \text{ mol} = 8.92 \times 10^{-3} \text{ mol}$

For the 0.2 g Pt (0.2%)/P25 catalyst:

The amount of substance Pt:  $n_{\text{Pt}} = 2.05 \times 10^{-6} \text{ mol}$

The amount of substance  $\text{TiO}_2$ :  $n_{\text{TiO}_2} = 2.45 \times 10^{-3} \text{ mol}$

For Pt:  $\text{TON}_{\text{Pt}} = n_2/n_{\text{Pt}} = 4.35 \times 10^3$

For  $\text{TiO}_2$ :  $\text{TON}_{\text{TiO}_2} = n_2/n_{\text{TiO}_2} = 3.64$
